# Supplementary material for: Anticancer metallodrugs of glutamic acid sulphonamides: in silico, DNA binding, hemolysis and anticancer studies
Source: Royal Society of Chemistry journal article supplement (doi:10.1039/c4ra02570a), 2014-01-01
Supplement: c4ra02570a1.pdf [file c4ra02570a1.pdf]

## **Supplementary Information for Online Publication**

### **Anticancer Metallodrugs of Glutamic Acid Sulphonamides: *In Silico*, DNA Binding, Hemolysis and Anticancer Studies**

**\*Imran Ali<sup>1</sup>, Waseem A. Wani<sup>1</sup>, Kishwar Saleem<sup>1</sup> and Ming-Fa Hsieh<sup>2</sup>**

<sup>1</sup>Department of Chemistry  
Jamia Millia Islamia (Central University)  
New Delhi - 110025, INDIA

<sup>2</sup>Department of Biomedical Engineering, Chung Yuan Christian University, 200,  
Chung Pei Rd., Chung Li, Taiwan

\*: Correspondence: drimran\_ali@yahoo.com, drimran.chiral@gmail.com

Phone No.: 0091-9211458226, Fax No.: 0091-11-26985507

**Figure S1:** UV-Vis. spectra of NiL1 to RuL3 in PBS at 7.4 pH. The solid red and dashed black lines indicate the spectra of fresh solutions and the spectra of solutions after 24 h.

**Figure S2:** Absorption spectra of NiL1 ( $1.6 \times 10^{-4}$  M) in the absence (red dashed line) and presence (solid lines) of increasing DNA concentrations;  $0.5 \times 10^{-4}$  M (blue),  $0.8 \times 10^{-4}$  M (green),  $1.1 \times 10^{-4}$  M (red) and  $1.4 \times 10^{-4}$  M (black). Arrow indicates the hyperchromic shifts on increasing DNA concentrations ( $0.5 - 1.4 \times 10^{-4}$  M).

**Figure S3:** Absorption spectra of RuL1 ( $1.6 \times 10^{-4}$  M) in the absence (red dashed line) and presence (solid lines) of increasing DNA concentrations;  $0.5 \times 10^{-4}$  M (blue),  $0.8 \times 10^{-4}$  M (green),  $1.1 \times 10^{-4}$  M (red) and  $1.4 \times 10^{-4}$  M (black). Arrow indicates the hyperchromic shifts on increasing DNA concentrations ( $0.5 - 1.4 \times 10^{-4}$  M).

**Figure S4:** Absorption spectra of L2 ( $1.6 \times 10^{-4}$  M) in the absence (red dashed line) and presence (solid lines) of increasing DNA concentrations;  $0.5 \times 10^{-4}$  M (blue),  $0.8 \times 10^{-4}$  M (green),  $1.1 \times 10^{-4}$  M (red) and  $1.4 \times 10^{-4}$  M (black). Arrow indicates the hyperchromic shifts on increasing DNA concentrations ( $0.5 - 1.4 \times 10^{-4}$  M).

**Figure S5:** Absorption spectra of CuL2 ( $1.6 \times 10^{-4}$  M) in the absence (red dashed line) and presence (solid lines) of increasing DNA concentrations;  $0.5 \times 10^{-4}$  M (blue),  $0.8 \times 10^{-4}$  M (green),  $1.1 \times 10^{-4}$  M (red) and  $1.4 \times 10^{-4}$  M (black). Arrow indicates the hyperchromic shifts on increasing DNA concentrations ( $0.5 - 1.4 \times 10^{-4}$  M).

**Figure S6:** Absorption spectra of NiL2 ( $1.6 \times 10^{-4}$  M) in the absence (red dashed line) and presence (solid lines) of increasing DNA concentrations;  $0.5 \times 10^{-4}$  M (blue),  $0.8 \times 10^{-4}$  M (green),  $1.1 \times 10^{-4}$  M (red) and  $1.4 \times 10^{-4}$  M (black). Arrow indicates the hyperchromic shifts on increasing DNA concentrations ( $0.5 - 1.4 \times 10^{-4}$  M).

**Figure S7:** Absorption spectra of RuL2 ( $1.6 \times 10^{-4}$  M) in the absence (red dashed line) and presence (solid lines) of increasing DNA concentrations;  $0.5 \times 10^{-4}$  M (blue),  $0.8 \times 10^{-4}$  M (green),  $1.1 \times 10^{-4}$  M (red) and  $1.4 \times 10^{-4}$  M (black). Arrow indicates the hyperchromic shifts on increasing DNA concentrations ( $0.5 - 1.4 \times 10^{-4}$  M).

**Figure S8:** Absorption spectra of L3 ( $1.6 \times 10^{-4}$  M) in the absence (red dashed line) and presence (solid lines) of increasing DNA concentrations;  $0.5 \times 10^{-4}$  M (blue),  $0.8 \times 10^{-4}$  M (green),  $1.1 \times 10^{-4}$  M (red) and  $1.4 \times 10^{-4}$  M (black). Arrow indicates the hyperchromic shifts on increasing DNA concentrations ( $0.5 - 1.4 \times 10^{-4}$  M).

**Figure S9:** Absorption spectra of CuL3 ( $1.6 \times 10^{-4}$  M) in the absence (red dashed line) and presence (solid lines) of increasing DNA concentrations;  $0.5 \times 10^{-4}$  M (blue),  $0.8 \times 10^{-4}$  M (green),  $1.1 \times 10^{-4}$  M (red) and  $1.4 \times 10^{-4}$  M (black). Arrow indicates the hyperchromic shifts on increasing DNA concentrations ( $0.5 - 1.4 \times 10^{-4}$  M).

**Figure S10:** Absorption spectra of NiL3 ( $1.6 \times 10^{-4}$  M) in the absence (red dashed line) and presence (solid lines) of increasing DNA concentrations;  $0.5 \times 10^{-4}$  M (blue),  $0.8 \times 10^{-4}$  M (green),  $1.1 \times 10^{-4}$  M (red) and  $1.4 \times 10^{-4}$  M (black). Arrow indicates the hyperchromic shifts on increasing DNA concentrations ( $0.5 - 1.4 \times 10^{-4}$  M).

**Figure S11:** Absorption spectra of RuL3 ( $1.6 \times 10^{-4}$  M) in the absence (red dashed line) and presence (solid lines) of increasing DNA concentrations;  $0.5 \times 10^{-4}$  M (blue),  $0.8 \times 10^{-4}$  M (green),

$1.1 \times 10^{-4}$  M (red) and  $1.4 \times 10^{-4}$  M (black). Arrow indicates the hyperchromic shifts on increasing DNA concentrations ( $0.5 - 1.4 \times 10^{-4}$  M).

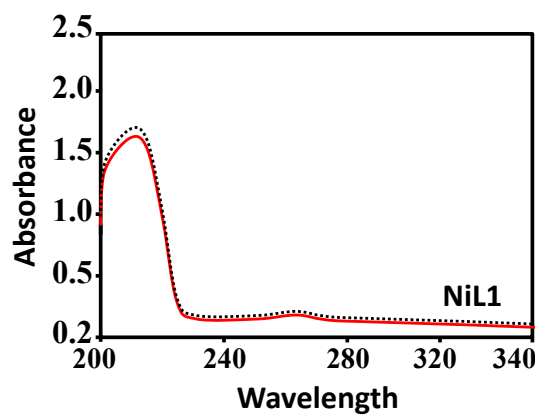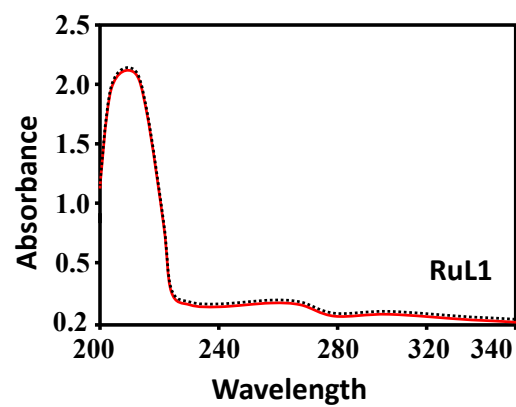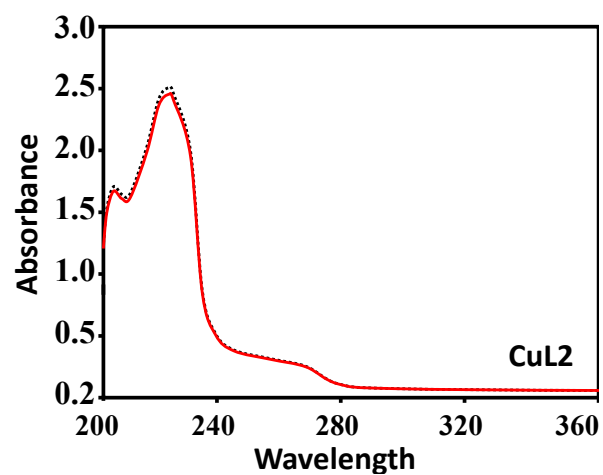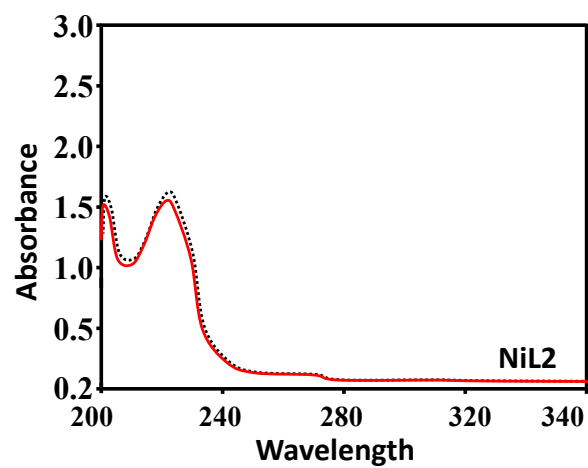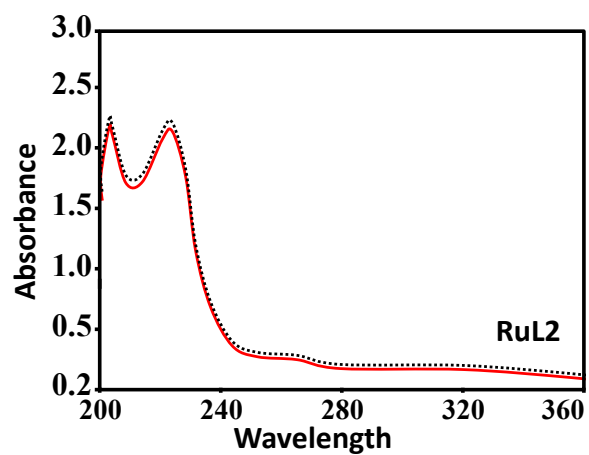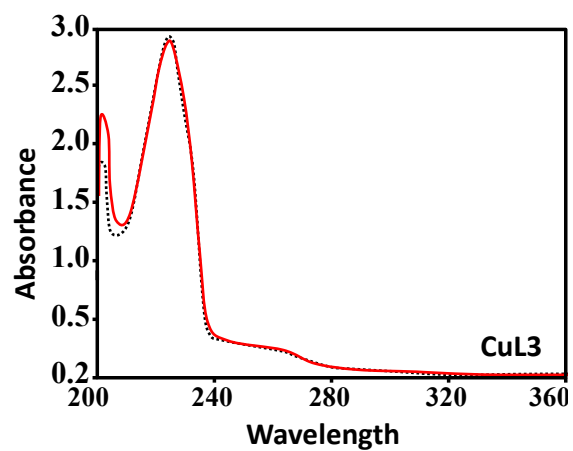

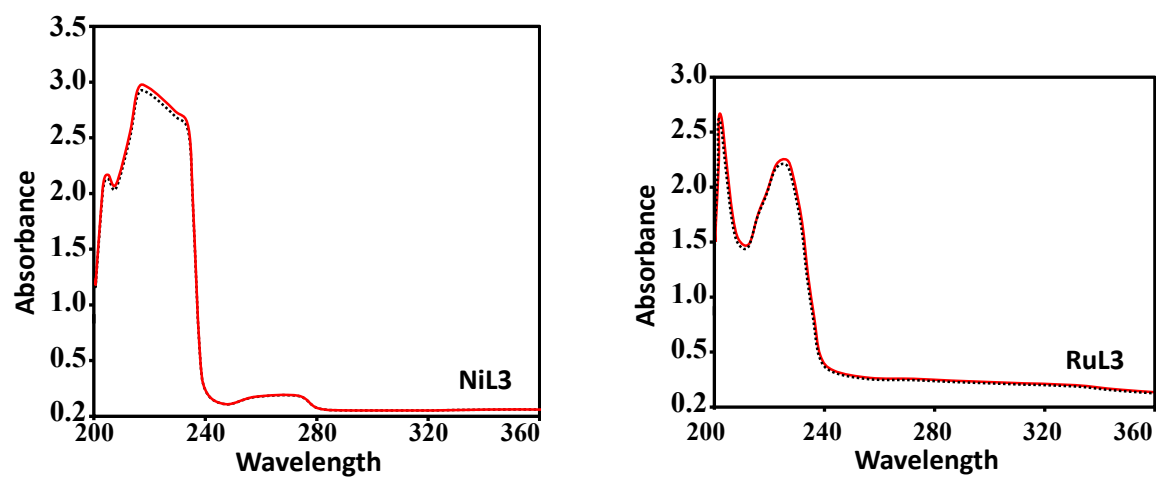

Figure S1

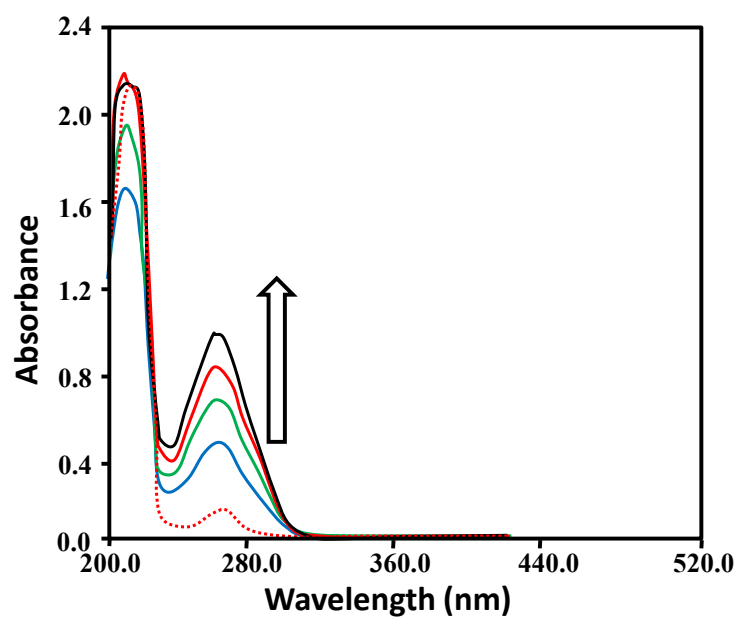

Figure S2

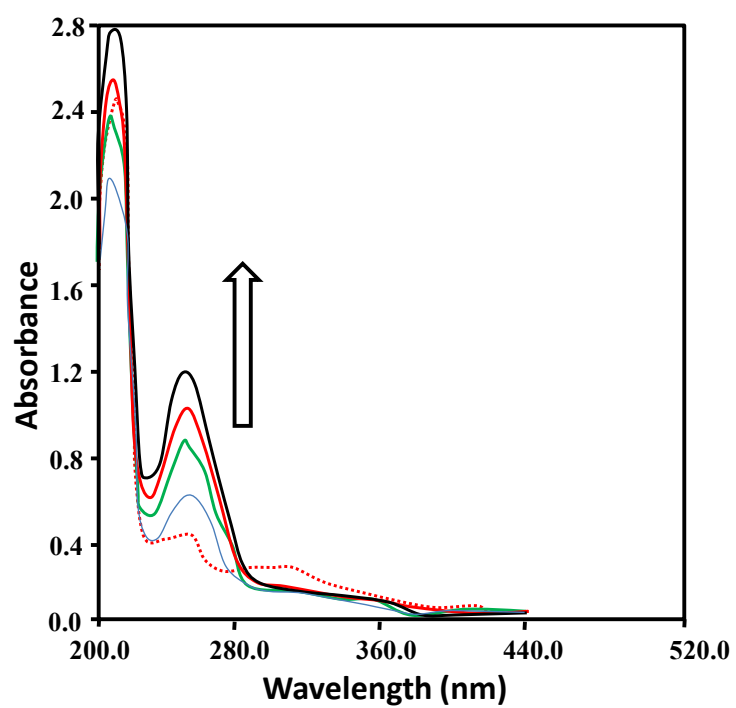

Figure S3

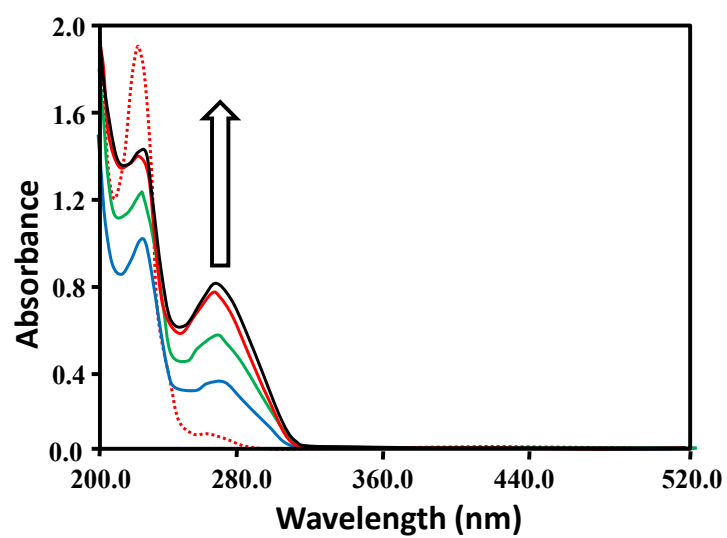

Figure S4

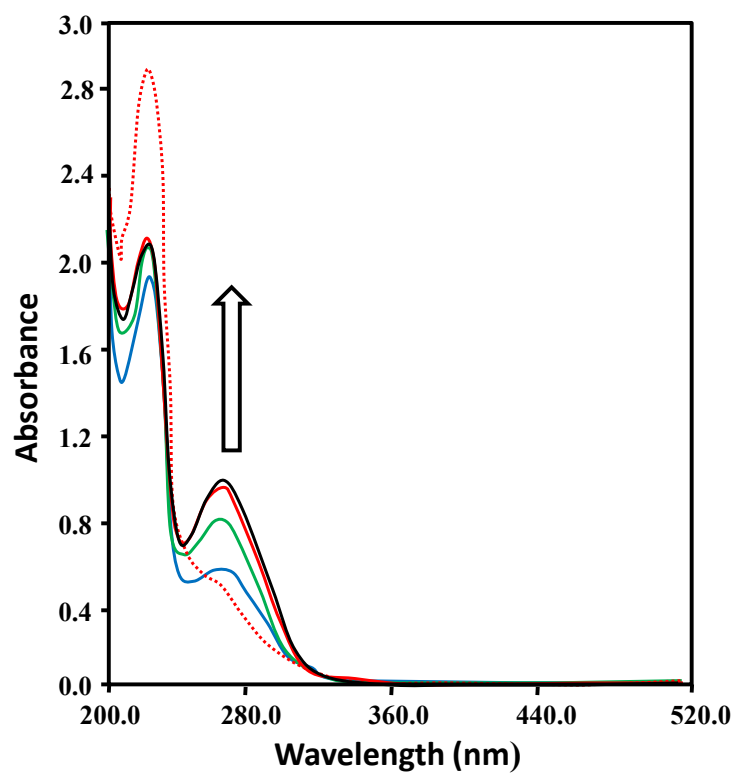

Figure S5

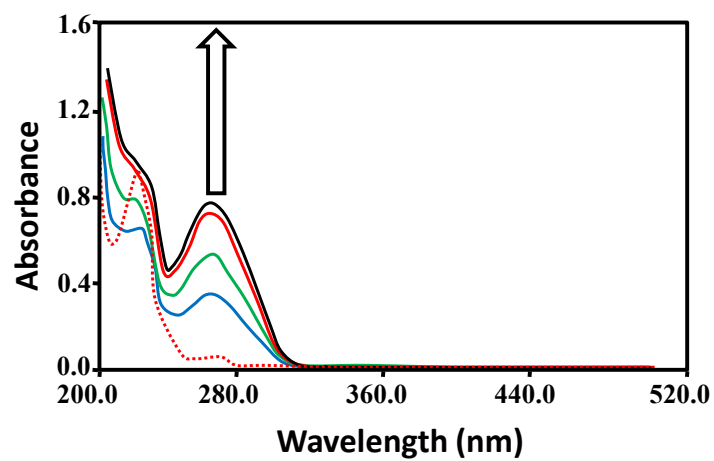

Figure S6

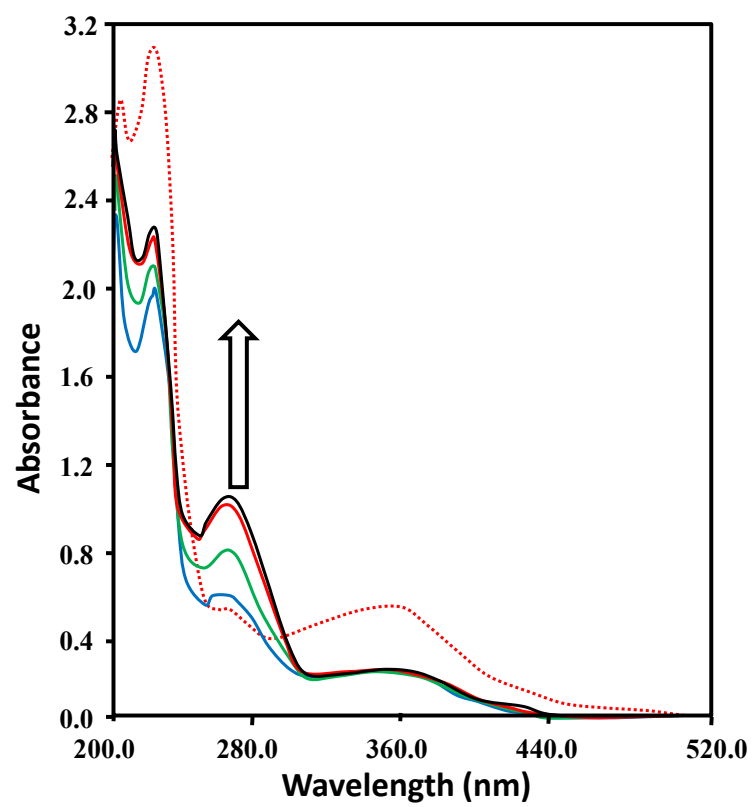

Figure S7

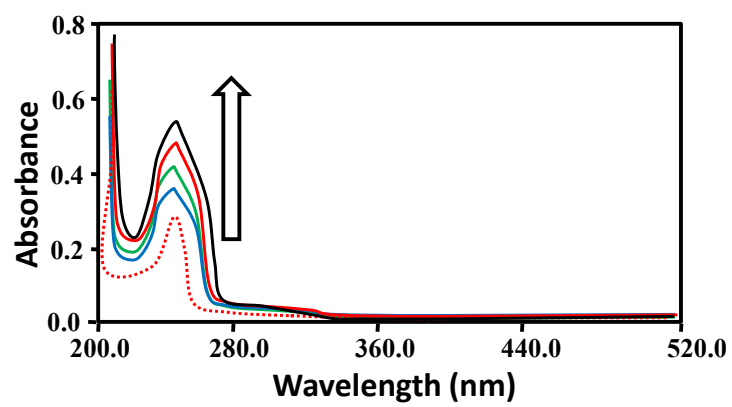

Figure S8

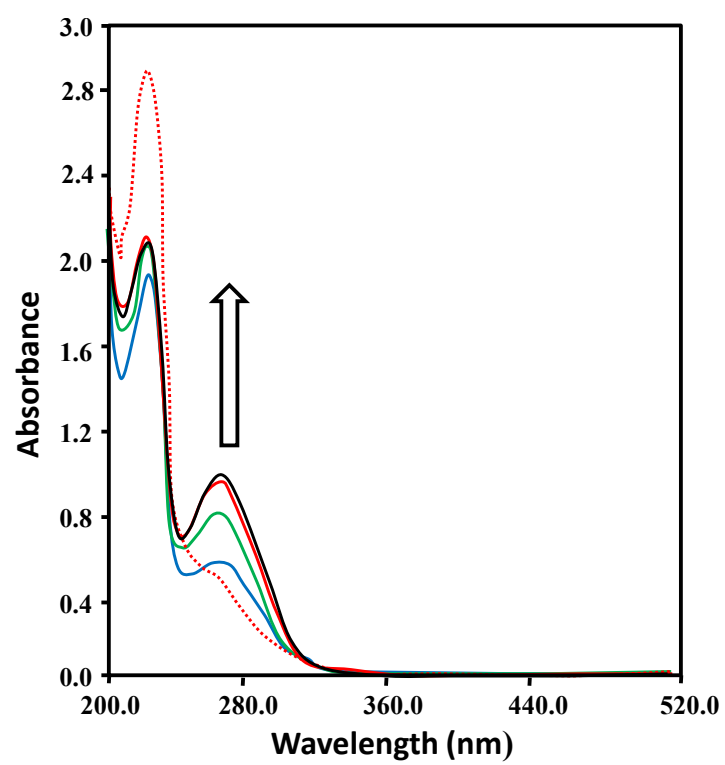

Figure S9

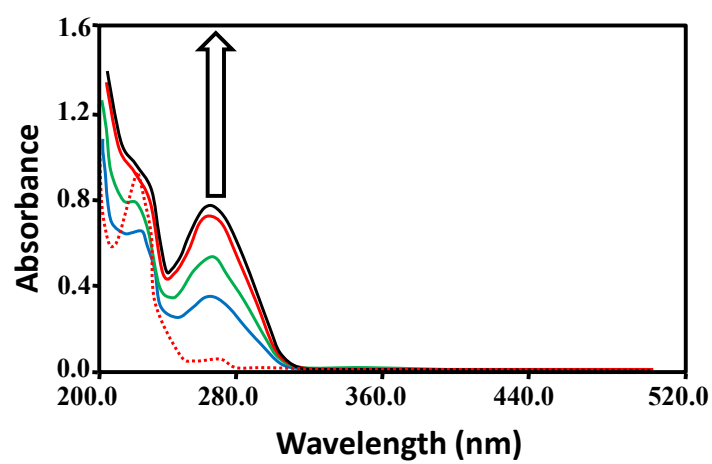

Figure S10

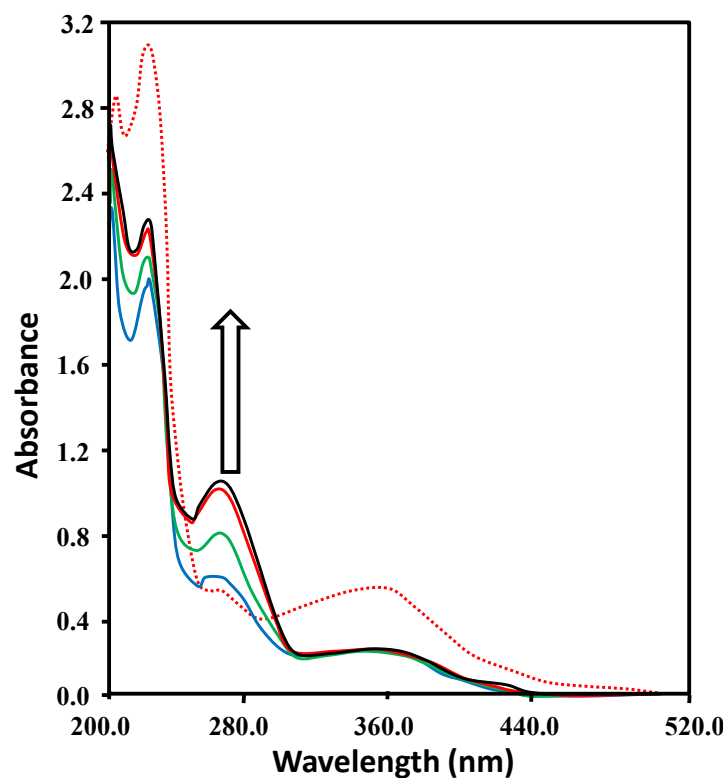

**Figure S11**

**Abbreviations:**

DNA: deoxyribose nucleic acid

PBS: Phosphate buffered saline

UV-Vis: Ultraviolet Visible
